# Supplementary material for: Ultra small gold nanoparticles–graphitic carbon nitride composite: an efficient catalyst for ultrafast reduction of 4-nitrophenol and removal of organic dyes from water
Source: Royal Society of Chemistry journal article supplement (doi:10.1039/c5ra04913j), 2015-01-01
Supplement: c5ra04913j1.pdf [file c5ra04913j1.pdf]

## Supporting Information

### **Ultra Small Gold Nanoparticles-Graphitic Carbon Nitride Composite: An efficient catalyst for ultrafast reduction of 4-nitrophenol and removal of organic dyes from water**

Tanmay Bhowmik<sup>‡</sup>, Manas Kumar Kundu<sup>‡</sup>, Sudip Barman\*

School of Chemical Sciences, National Institute of Science Education and Research (NISER), Bhubaneswar, Orissa - 751 005, India.

<sup>‡</sup> Authors of equal contributions

## Material

Formamide ( $\text{HCONH}_2$ , HPLC grade), hydrogen tetrachloroaurate(III) ( $\text{HAuCl}_4 \cdot x \text{H}_2\text{O}$ , 99.999%) and 4-nitrophenol(4-NP, >95%), rhodamine-B (>95 %) and methyl red (>95%), methylene blue (>95 %) was bought from Sigma-Aldrich. Sulfuric acid ( $\text{H}_2\text{SO}_4$ , 98%) was purchased from Merck and sodium borohydride ( $\text{NaBH}_4$ ) was taken from Spectrochem. These all chemicals were used as they received without further purification. Mili-Q water was obtained from ultra filtration system (Mili-Q, Milipore) with the measured conductivity  $35 \text{ mho cm}^{-1}$  at  $25^\circ\text{C}$ .

## Characterizations

For microwave synthesis of  $\text{g-C}_3\text{N}_4$  MAS-II microwave synthesizer from SINEO Microwave Chemistry Technology Company (Shanghai, China) was used. Ultrasound was performed by SINEO UWave-1000 (Shanghai, China) with 28 kHz frequency. The surface morphology was investigated by Transmission Electron Microscopy (TEM, FEI, Technai G2 2010, operated at 200 kV). TEM samples were prepared by drop casting a drop and dried at air around  $45^\circ\text{C}$ . For TEM  $30 \mu\text{l}$  of  $2 \times 10^{-5} \text{ mg/l}$  solution was drop casted in a TEM grid. The powder x-ray diffraction pattern (pXRD) experiment was performed by Bruker DAVINCI D8 ADVANCE diffractometer equipped with Cu K $\alpha$  radiation ( $\lambda$  0.15406 nm). Fluorescence study was done by spectrofluorimeter from Perkin Elmer (Model is LS 55). XPS measurements were done using VG Microtech where monochromatic Mg K $\alpha$  X-ray was the source. Zeta potential of samples in solutions was measured at  $25^\circ \text{C}$  by using the Malvern Zetasizer Nano series instrument. UV-Vis spectra were recorded in Perkin-Elmer (model: Lambda-750) UV-Vis spectrometer. The UV light was exposed in the dye degradation experiment from Luzchem (Canada) at 250 nm wavelength 84 watt. Dye degradation in visible light was carried out by using 135 watt xenon lamp ( ARC lamp, Newport, Oriel Product line) at a distance 25 cm with a cut of filter  $\geq 420 \text{ nm}$ . Mass spectra were recorded on a Bruker micro TOF-Q II, ESI TOF mass

spectrometer. Thermo gravimetric analysis (TGA) was carried out by TA Instrument (model SDT Q600)

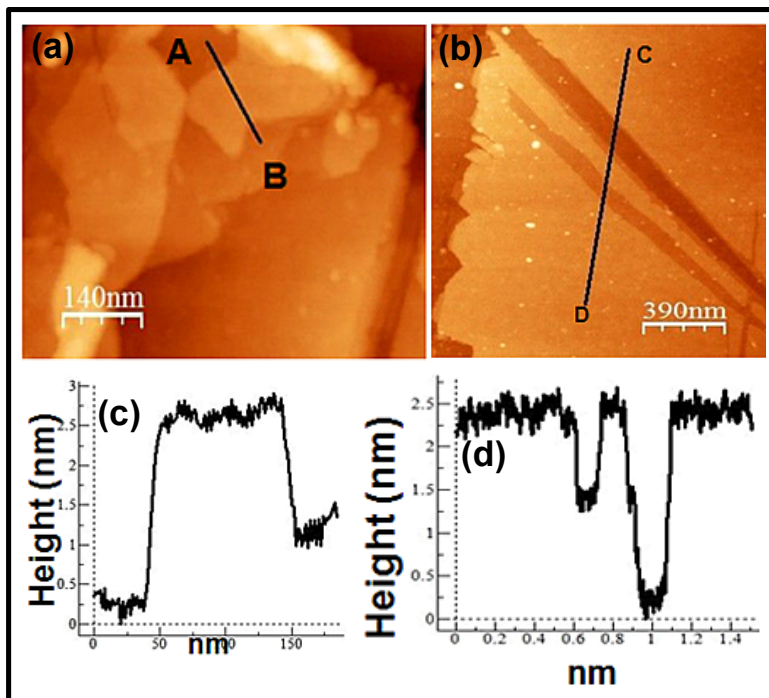

**Figure S1** AFM images of thin  $\text{CN}_x$  sheets and its height profile shows thickness 2.0 to 2.5 nm.

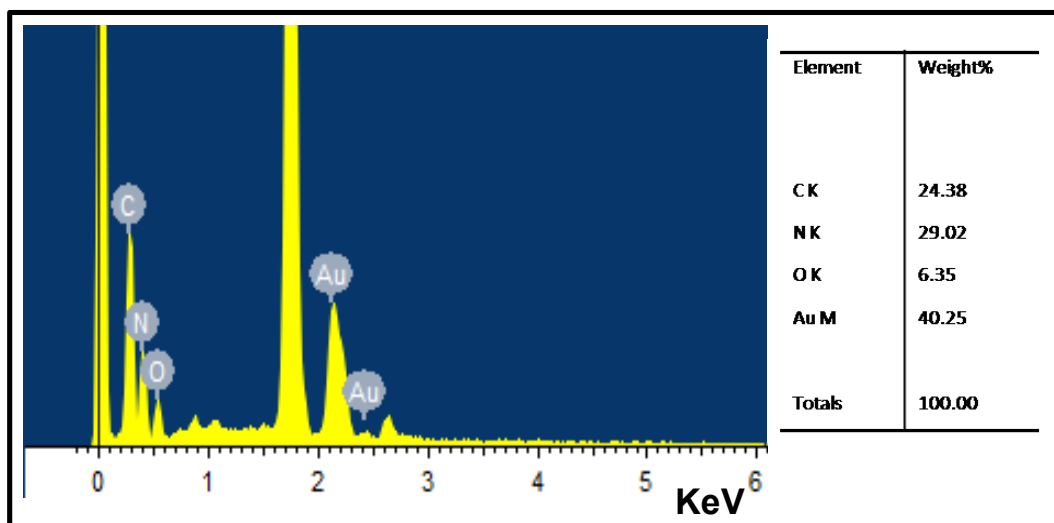

**Figure S2.** EDS spectra  $\text{AuCN}_x$  composite prepared on silicon wafer.

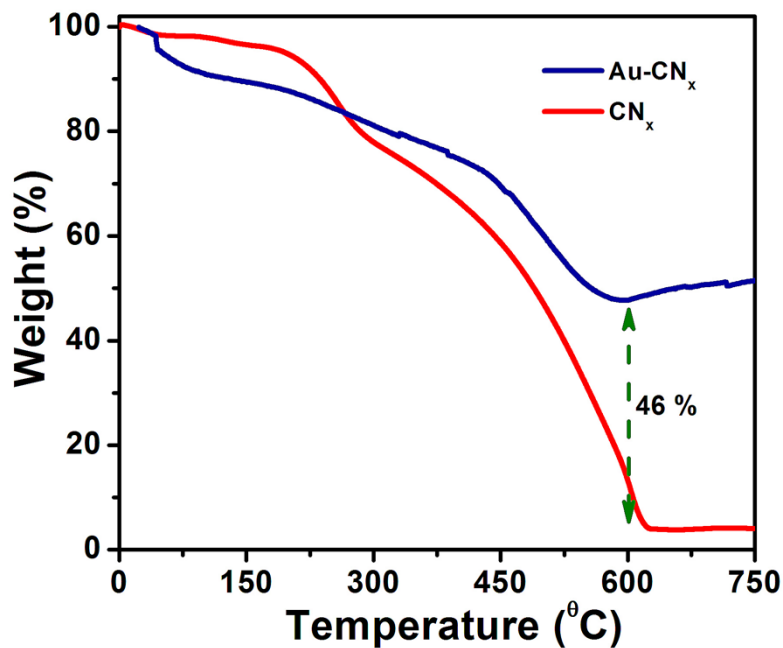

**Figure S3.** TGA spectra of Au-CN<sub>x</sub> (blue line) and CN<sub>x</sub> (red line) at N<sub>2</sub> atmosphere

**Table T1.** Comparison of activity of different catalyst on 4-NP reduction

| Catalyst                             | Amt. Of catalyst (mg) | Amt. Of 4-NP (mmol) | Amt.Of NaBH <sub>4</sub> (mmol) | Conv. Time (Sec) | Ref.      |
|--------------------------------------|-----------------------|---------------------|---------------------------------|------------------|-----------|
| Au-CN <sub>x</sub>                   | 5                     | 3x10 <sup>-4</sup>  | 3x10 <sup>-1</sup>              | 15               | This Work |
| Porous Au                            | 0.5                   | 5x10 <sup>-4</sup>  | 2x10 <sup>-1</sup>              | 80               | 1         |
| Porous Au-PdNPs                      | 0.5                   | 5x10 <sup>-4</sup>  | 2x10 <sup>-1</sup>              | 12               | 1         |
| RGO@Pd@C                             | 5                     | 3x10 <sup>-4</sup>  | 3x10 <sup>-2</sup>              | 30               | 2         |
| Pd-rGO-CNT                           | 5                     | 3x10 <sup>-4</sup>  | 3x10 <sup>-2</sup>              | 20               | 3         |
| Au-mpg C <sub>3</sub> N <sub>4</sub> | 5                     | 3x10 <sup>-4</sup>  | 3x10 <sup>-1</sup>              | 300              | 4         |

**Table T2.** Parameters of different isotherm model of MB dye.

| MB dye                        | Isotherm models |          |       |
|-------------------------------|-----------------|----------|-------|
| Parameter                     | Freundlich      | Langmuir | sips  |
| <b>K(mg/gm)</b>               | 20.63           | -        | -     |
| <b>n</b>                      | 2.72            | -        | 1.30  |
| <b>q<sub>max</sub>(mg/gm)</b> | -               | 200      | 235   |
| <b>b</b>                      | -               | 0.01     | 0.02  |
| <b>R<sup>2</sup></b>          | 0.985           | 0.993    | 0.994 |

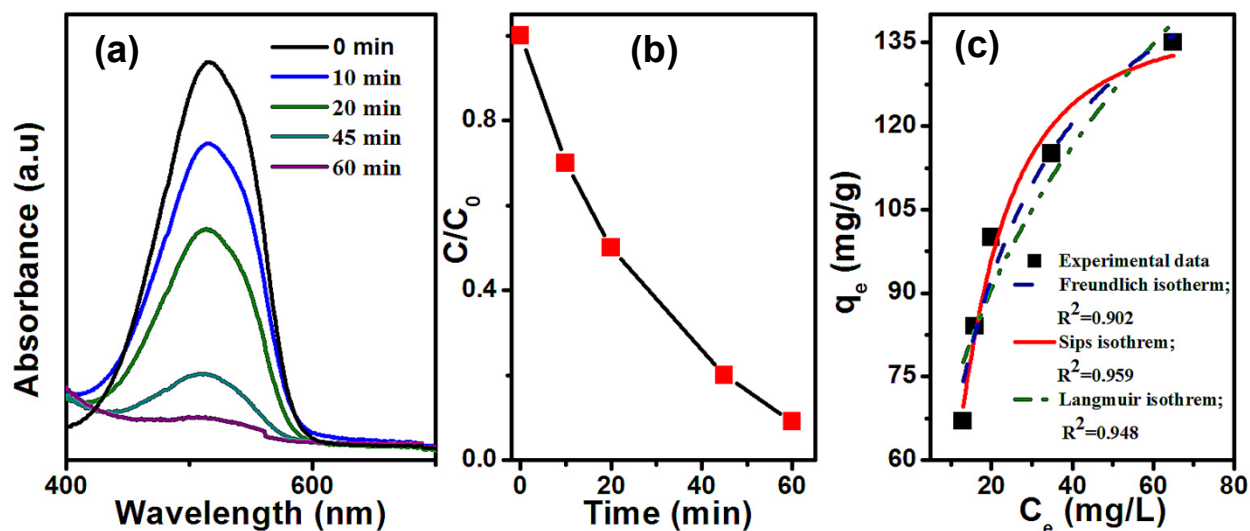

**Figure S4.** (a) UV-Visible absorption spectra of aqueous solution of MR at different time interval in presence of Au-CN<sub>x</sub> catalyst. (b) Plot of  $C/C_0$  vs time for MR dyes respectively where  $C_0$  is initial concentration of dyes (20 ppm) and  $C$  is the concentration at different time interval. (c) Fitting of different isotherm model with adsorption of MR on Au-CN<sub>x</sub> surfaces. All the experiment was done with 1 ml of 20 ppm dyes with 1 mg Au-CN<sub>x</sub> catalyst

**Table T3.** Parameters of different isotherm model of MR dye.

| MR dye                        | Isotherm models |          |       |
|-------------------------------|-----------------|----------|-------|
| Parameter                     | Freundlich      | Langmuir | sips  |
| <b>K(mg/gm)</b>               | 30.7            | -        | -     |
| <b>n</b>                      | 2.7             | -        | 0.54  |
| <b>q<sub>max</sub>(mg/gm)</b> | -               | 120      | 130   |
| <b>b</b>                      | -               | 0.05     | 0.01  |
| <b>R<sup>2</sup></b>          | 0.89            | 0.948    | 0.959 |

**Table T4.** Comparison of rate constant for photocatalytic degradation of different dyes.

| Catalyst                                  | Dye        | Concentrati<br>on of Dye | Light source         | Rate<br>constant                       | Ref.             |
|-------------------------------------------|------------|--------------------------|----------------------|----------------------------------------|------------------|
| Graphene- Gold<br>PD/MW                   | RhB        | 2.5 ppm                  | Visible light        | $8.3 \times 10^{-3}$                   | 5                |
|                                           | RhB        | 2 ppm                    | Microwave<br>light   | $1.7 \times 10^{-2}$                   | 6                |
| RGO-CuNO <sub>3</sub>                     | RhB        | 2.5 ppm                  | Visible light        | $1.5 \times 10^{-2}$                   | 7                |
| Ag-C <sub>3</sub> N <sub>4</sub>          | RhB        | 10 ppm                   | Visible light        | $2.53 \times 10^{-2}$                  | 8                |
| <b>Au-CN<sub>x</sub></b>                  | <b>RhB</b> | <b>~30 ppm</b>           | <b>Visible light</b> | <b><math>2.4 \times 10^{-2}</math></b> | <b>This work</b> |
| Ag/AgCl                                   | MB         | 20 ppm                   | Visible light        | $7.0 \times 10^{-3}$                   | 9                |
| Ag/AgCl/g-C <sub>3</sub> N <sub>4</sub>   | MB         | 10 ppm                   | Visible light        | $7.8 \times 10^{-2}$                   | 10               |
| Au <sup>3+</sup> -TiO <sub>2</sub> (0.5%) | MB         | 12 ppm                   | Visible light        | $9.2 \times 10^{-3}$                   | 11               |
| <b>Au-CN<sub>x</sub></b>                  | <b>MB</b>  | <b>~35 ppm</b>           | <b>Visible light</b> | <b><math>2.4 \times 10^{-2}</math></b> | <b>This work</b> |
| TiO <sub>2</sub>                          | MR         | 4 ppm                    | UV light             | $1.3 \times 10^{-2}$                   | 12               |
| Ag <sup>+</sup> /TiO <sub>2</sub>         | MR         | 6 ppm                    | UV light             | $5.02 \times 10^{-3}$                  | 13               |
| <b>Au-CN<sub>x</sub></b>                  | <b>MR</b>  | <b>~35 ppm</b>           | <b>Visible light</b> | <b><math>2.0 \times 10^{-2}</math></b> | <b>This work</b> |

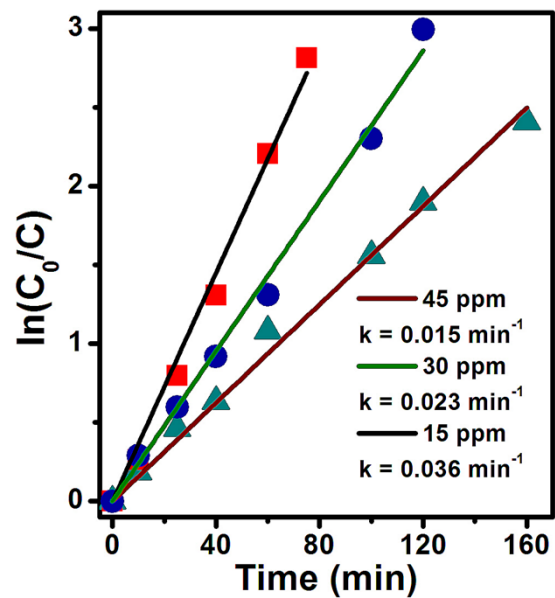

**Figure S5.**  $\ln(C_0/C)$  vs time plot of different concentration of RhB under visible light illumination.

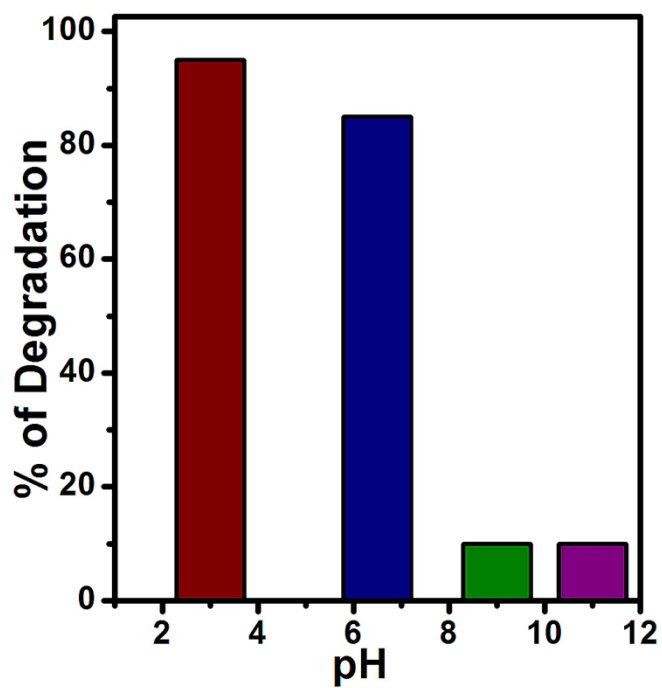

**Figure S6.** pH dependent degradation efficiency of 70 ppm RhB with Au-CN<sub>x</sub> catalyst

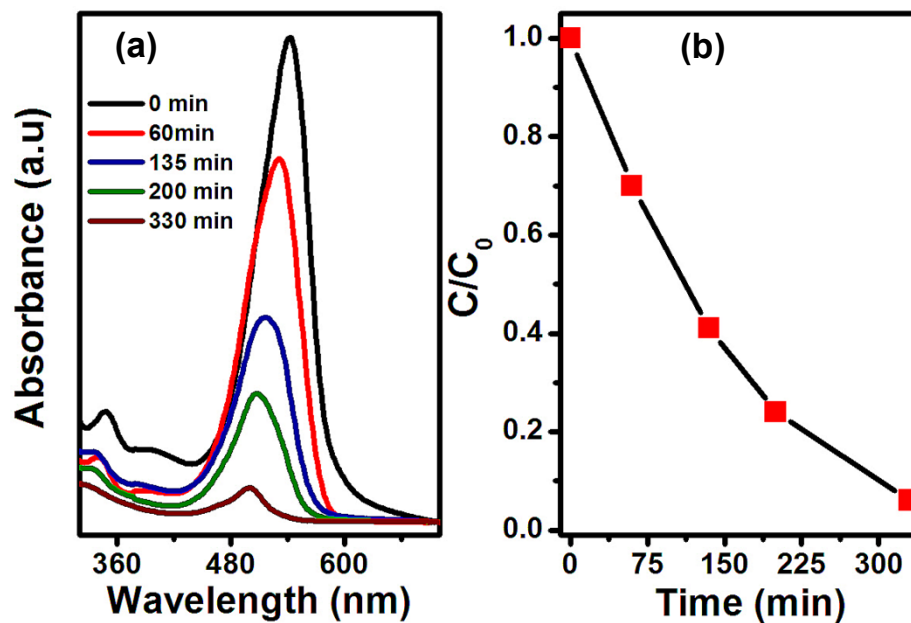

**Figure S7.** Degradation of 250 ppm RhB dye by Au-CN<sub>x</sub> under visible light after 10 hour adsorption. (a) The change of UV-Visible Spectra at different time intervals, (b)  $C/C_0$  vs time plot.

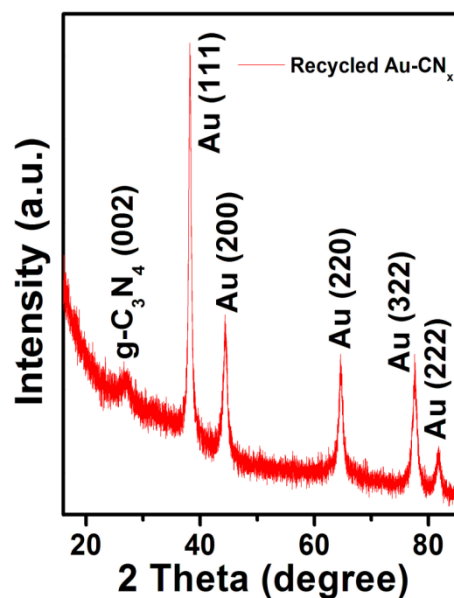

**Figure S8.** p-XRD of recycled (after 3<sup>rd</sup> catalytic cycles) catalyst.

## REFERENCES

1. A. Ma, J. Xu, X. Zhang, B. Zhang, D. Wang and H. Xu, *Sci. Rep.*, 2014, **4**, DOI: 10.1038/srep04849 (02014).
2. Z. Zhang, F. Xiao, J. Xi, T. Sun, S. Xiao, H. Wang, S. Wang and Y. Liu, *Sci. Rep.*, 2014, **4**, DOI: 10.1038/srep04053 (02014).
3. T. Sun, Z. Zhang, J. Xiao, C. Chen, F. Xiao, S. Wang and Y. Liu, *Sci. Rep.*, 2013, **3**.
4. X.-H. Li, X. Wang and M. Antonietti, *Chem. Sci.*, 2012, **3**, 2170-2174.
5. Z. Xiong, L. L. Zhang, J. Ma and X. S. Zhao, *Chem. Commun.*, 2010, **46**, 6099-6101.
6. S. Horikoshi, H. Hidaka and N. Serpone, *Environ. Sci. Technol.*, 2002, **36**, 1357-1366.
7. Z. Xiong, L. L. Zhang and X. S. Zhao, *Chem. Eur. J.*, 2011, **17**, 2428-2434.
8. S. W. Hu, L. W. Yang, Y. Tian, X. L. Wei, J. W. Ding, J. X. Zhong and P. K. Chu, *Appl. Catal. B: Environmental*, 2015, **163**, 611-622.
9. C. An, S. Peng and Y. Sun, *Adv. Mater.*, 2010, **22**, 2570-2574.
10. X. Yao, X. Liu and X. Hu, *ChemCatChem*, 2014, **6**, 3409-3418.
11. X. Z. Li and F. B. Li, *Environ. Sci. Technol.*, 2001, **35**, 2381-2387.
12. G. Mascolo, R. Comparelli, M. L. Curri, G. Lovecchio, A. Lopez and A. Agostiano, *J. Hazard. Mater.*, 2007, **142**, 130-137.
13. A. K. Gupta, A. Pal and C. Sahoo, *Dyes and Pigments*, 2006, **69**, 224-232.
